# Supplementary material for: Feasibility of a Type 2 Diabetes Prevention Program at Nationwide Level in General Practice: A Pilot Study in Italy
Source: MDPI journal article supplement (doi:10.3390/jcm13041127), 2024-02-16
Supplement: s1 [file s1]

## **Supplementary Material**

Supplement to: La Grotta R., et al. Feasibility of a diabetes prevention program at nationwide level in general practice: a pilot study in Italy.

**Supplementary Table S1. Examples of physical activity prescriptions tailored according to category of risk. Source references for evidence-based prescriptions are provided.**

| Category of risk (PAR-Q)                                                                             | Prescription                                                                                                  | Resistance Training                                                                                                                           | Example                                                                                                                                                                                      | Reference |
|------------------------------------------------------------------------------------------------------|---------------------------------------------------------------------------------------------------------------|-----------------------------------------------------------------------------------------------------------------------------------------------|----------------------------------------------------------------------------------------------------------------------------------------------------------------------------------------------|-----------|
| <b>Low Risk ( Younger individuals, asymptomatic, meeting no more than one risk factor threshold)</b> | Recommend moderate-intensity aerobic activities                                                               | 150 minutes per week.<br>Suggest incorporating two or more days a week focusing on major muscle groups using body weight exercises or weights | Encourage activities such as brisk walking, cycling, swimming, or dancing for 30 minutes on most days of the week                                                                            | 1,2       |
| <b>Moderate Risk (Older individuals over 45 years old with two or more risk factors)</b>             | Advocate a combination of moderate to vigorous aerobic exercises                                              | Emphasize incorporating resistance exercises targeting major muscle groups using weights or resistance bands at least two days a week         | Recommend alternating between jogging or cycling for 25-30 minutes on most days along with high-intensity interval training (HIIT) twice a week                                              | 3,4       |
| <b>High Risk (Individuals with known cardiovascular or pulmonary diseases)</b>                       | Advocate supervised exercise programs focusing on low to moderate intensity, gradually progressing over time. | Highlight the importance of focusing on cardiac rehabilitation exercises under professional guidance to ensure safety and proper monitoring   | Initiate with supervised low-impact exercises like water aerobics or stationary cycling for 20-30 minutes, three times a week, gradually increasing duration and intensity under supervision | 5,6       |

References:

1. Haskell, W. L., et al. (2007). Physical activity and public health: updated recommendation for adults from the American College of Sports Medicine and the American Heart Association. *Medicine and Science in Sports and Exercise*, 39(8), 1423-1434. DOI: 10.1249/mss.0b013e3180616b27.
2. Garber, C. E., et al. (2011). Quantity and quality of exercise for developing and maintaining cardiorespiratory, musculoskeletal, and neuromotor fitness in apparently healthy adults: guidance for prescribing exercise. *Medicine and Science in Sports and Exercise*, 43(7), 1334-1359. DOI: 10.1249/MSS.0b013e318213fefb.
3. Weston, K. S., et al. (2014). High-intensity interval training in patients with lifestyle-induced cardiometabolic disease: a systematic review and meta-analysis. *British Journal of Sports Medicine*, 48(16), 1227-1234. DOI: 10.1136/bjsports-2013-092576.
4. American College of Sports Medicine. (2009). American College of Sports Medicine position stand. Progression models in resistance training for healthy adults. *Medicine and Science in Sports and Exercise*, 41(3), 687-708. DOI: 10.1249/MSS.0b013e3181915670.
5. Taylor, R. S., et al. (2014). Exercise-based rehabilitation for heart failure. *Cochrane Database of Systematic Reviews*, 4(4), CD003331. DOI: 10.1002/14651858.CD003331.pub4.
6. Fletcher, G. F., et al. (2013). Exercise standards for testing and training: a scientific statement from the American Heart Association. *Circulation*, 128(8), 873-934. DOI: 10.1161/CIR.0b013e31829b5b44.

**Supplementary Figure S1. Screenshots from the web-based app used by the general practitioners showing the used version of the Findrisc and PAR-Q questionnaires.**

# FINDRISC

Spesso chi ha il diabete se ne accorge quando occhi, reni, cuore o cervello sono già danneggiati. A quel punto si può solamente intervenire per fermare le complicanze, non per guarire. Il diabete però si può prevenire, ma per fare questo è necessario che ciascuno:

- Conosca il RISCIO di sviluppare la malattia
- Misuri il livello di zucchero nel sangue (glicemia)
- Misuri la pressione arteriosa
- Adotti uno stile di vita sano.

Le chiediamo quindi di compilare questo modulo, chiamato Questionario di Tournebise o FINDRISC (pubblicato da Diabete Care 26.725-731, 2003), che permette di valutare la probabilità di sviluppare diabete entro 10 anni e rappresenta quindi un primo e potente indicatore per adottare misure di prevenzione.

1

Tutti i campi sono obbligatori

INFORMATIVA

\* è obbligatorio far firmare l'informativa per la privacy

Nome

Cognome

Codice fiscale

Data di nascita

01/06/2021

Statura

170 cm

Peso

70 Kg

BMI

24 kg/m2

Circonferenza vita

92 cm

Calcoli automatici, e-mailare risultati a: pasci

PA max

120 mmHg

PA min

80 mmHg

Sexo

☐ Maschio
 ☐ Femmina

1. Età

☐ Meno di 45 anni
 ☐ 45-54 anni
 ☐ 55-64 anni
 ☐ Più di 64 anni

2. Quanto spesso mangia frutta o verdura?

☐ Tutti i giorni
 ☐ Non tutti i giorni

3. Un medico o altro operatore sanitario le ha mai detto che aveva la glicemia alta? (in un esame medico, durante una malattia o la gravidanza)

☐ No
 ☐ Sì

4. Indice di massa corporea (BMI)

☐ Meno di 25 (kg/m2)
 ☐ 25-30 (kg/m2)
 ☐ Più di 30 (kg/m2)

Calcoli automatici, compilare statura e peso

5. Fa esercizio fisico per almeno 30 minuti quasi tutti i giorni?

☐ Sì
 ☐ No

6. Ha mai usato farmaci per la pressione alta?

☐ No
 ☐ Sì

7. A qualcuno della sua famiglia è mai stato diagnosticato il diabete?

☐ No
 ☐ Sì: nonni, zii, cugini
 ☐ Sì: genitori, fratelli, sorelle, figli

8. Circonferenza vita?

☐ Meno di 94 cm
 ☐ 94-102 cm
 ☐ Più di 102 cm

Calcoli automatici, compilare sesso e circonferenza vita

2

Tutti i campi sono obbligatori

Punteggio totale: 0

RESET

Salva


DMT2 RISK

LOGOUT

## PAR-Q

**Paziente:**

Traduzione e adattamento del PAR-Q (Physical Activity Readiness Questionnaire - PAR-Q) 2002, Canadian Society for Exercise Physiology, a cura della Multimedia S.p.A.

La pratica regolare di attività fisica è divertente e salutare, per cui sono sempre di più le persone che ogni giorno iniziano a diventare più attive. Aumentare la propria attività è sicuro per la maggioranza delle persone, tuttavia alcuni dovrebbero consultare il proprio medico prima di incrementare di molto il proprio livello di sforzo fisico. Se state pensando di diventare molto più attivi di quanto siete in questo momento, rispondete alle 7 domande seguenti. Se avete un'età compresa fra i 15 e 69 anni, il questionario sulla salute vi dirà se dovreste consultare comunque il vostro medico. Seguite il buon senso nel rispondere alle domande. Per favore leggete con cura le domande e rispondete onestamente a ciascuna di esse segnando SI o NO.

☒ **Tutti i campi sono obbligatori!**

- Il vostro medico vi ha mai detto che soffrite di problemi di cuore e che dovreste fare solo l'attività fisica raccomandata dal medico?  
☐ SI ☐ NO
- Sentite dolore al torace quando fate attività fisica?  
☐ SI ☐ NO
- Nell'ultimo mese, avete avuto dolore al torace quando non stavate facendo attività fisica?  
☐ SI ☐ NO
- Avete problemi di equilibrio per vertigini o avete svenimenti?  
☐ SI ☐ NO
- Avete problemi alle ossa o alle articolazioni (per esempio schiena, anche, ginocchia) che potrebbero peggiorare modificando l'attività fisica?  
☐ SI ☐ NO
- State assumendo medicine prescritte dal vostro medico (per esempio diuretici) per la pressione del sangue o per problemi al cuore?  
☐ SI ☐ NO
- Conoscete qualsiasi altra ragione per cui non dovreste fare attività fisica?  
☐ SI ☐ NO

☒ **Tutti i campi sono obbligatori!**

INDEI

SALVA
